# Supplementary material for: Chiral assembly of dodecahedral cavities into porous metal–organic frameworks
Source: Royal Society of Chemistry journal article supplement (doi:10.1039/c2cc35024f), 2012-01-01
Supplement: c2cc35024f.pdf [file c2cc35024f.pdf]

## Supporting Information

### Chiral Assembly of Dodecahedral Cavities into Porous Metal-Organic Frameworks

Hui Yang<sup>a,b</sup>, Fei Wang<sup>a</sup>, Yao Kang<sup>a</sup>, Tie-Hu Li<sup>b</sup> and Jian Zhang\*<sup>a</sup>

*<sup>a</sup>State Key Laboratory of Structural Chemistry, Fujian Institute of Research on the Structure of Matter, Chinese Academy of Sciences, Fuzhou, Fujian 350002, P. R. China.*

*<sup>b</sup>School of Materials Science and Engineering, Northwestern Polytechnical University, Xi'an, China 710072*  
*Email: [zhj@fjirsm.ac.cn](mailto:zhj@fjirsm.ac.cn)*

## Experimental Section

**Materials and Instrumentation:** All reagents were purchased commercially and used without further purification. All syntheses were carried out in 23 ml polytetrafluoroethylene lined stainless steel containers under autogenous pressure. FT-IR spectra were measured as KBr pellets on a Nicolet Magna 750 FT-IR spectrometer in the range of 400~4000  $\text{cm}^{-1}$ . Elemental analysis (EA) was measured on a vario MICRO. All Powder X-ray diffraction (PXRD) analyses were recorded on a Rigaku Dmax2500 diffractometer with Cu K $\alpha$  radiation ( $\lambda = 1.54056 \text{ \AA}$ ) with a step size of  $0.05^\circ$ . Thermal stability studies were carried out on a NETSCHZ STA-449C thermoanalyzer with a heating rate of  $10^\circ\text{C}/\text{min}$  under an air atmosphere. Gas adsorption measurement was performed in the ASAP (Accelerated Surface Area and Porosimetry) 2020 System. The content of copper and zinc (**2**) was measured by inductively coupled plasma atomic emission spectroscopy (ICP-AES). The valence of copper (**2**) was measured by X-ray photoelectron spectroscopy (XPS).

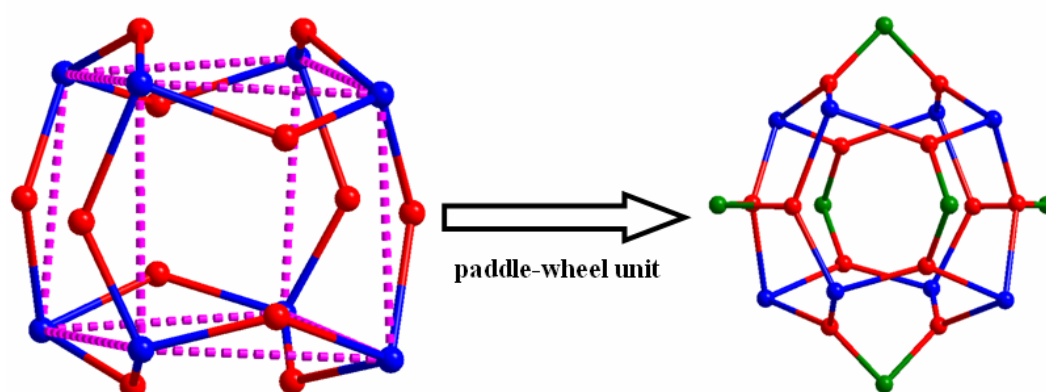

Figure S1. From cubic cavity turned into dodecahedral cavity in **1**.

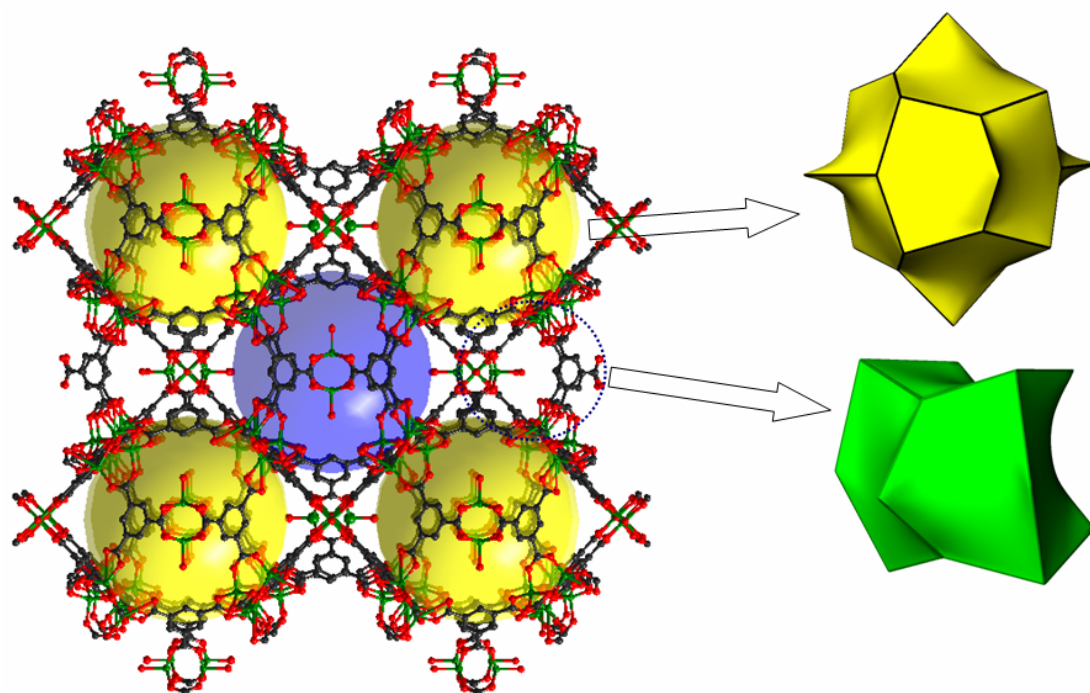

Figure S2. The dodecahedron and hexahedral cavities in **1**.

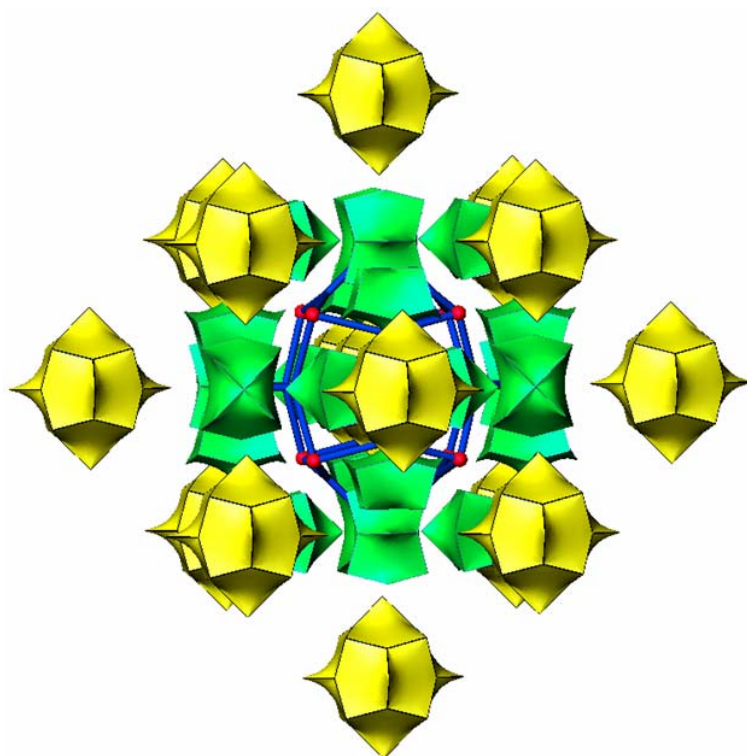

Figure S3. Its natural tiling showing the packing of the structures in **1**.

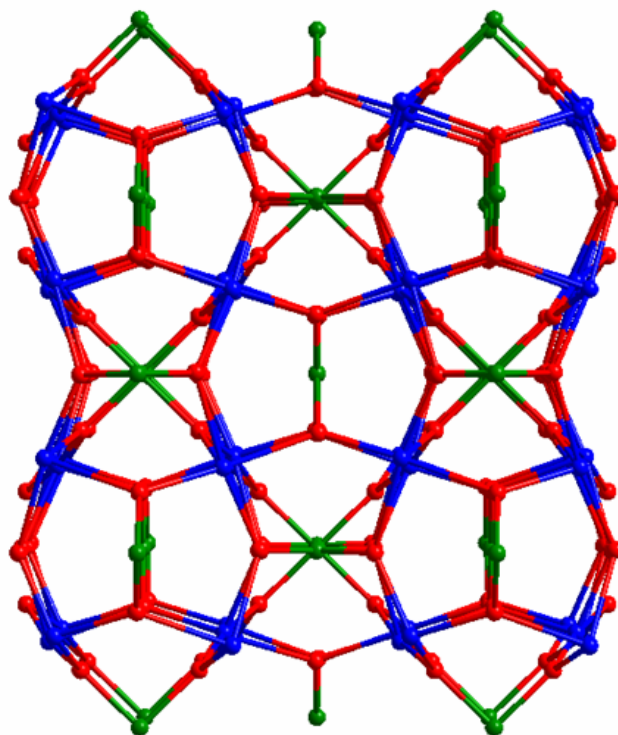

Figure S4. Topological representation of **1**.

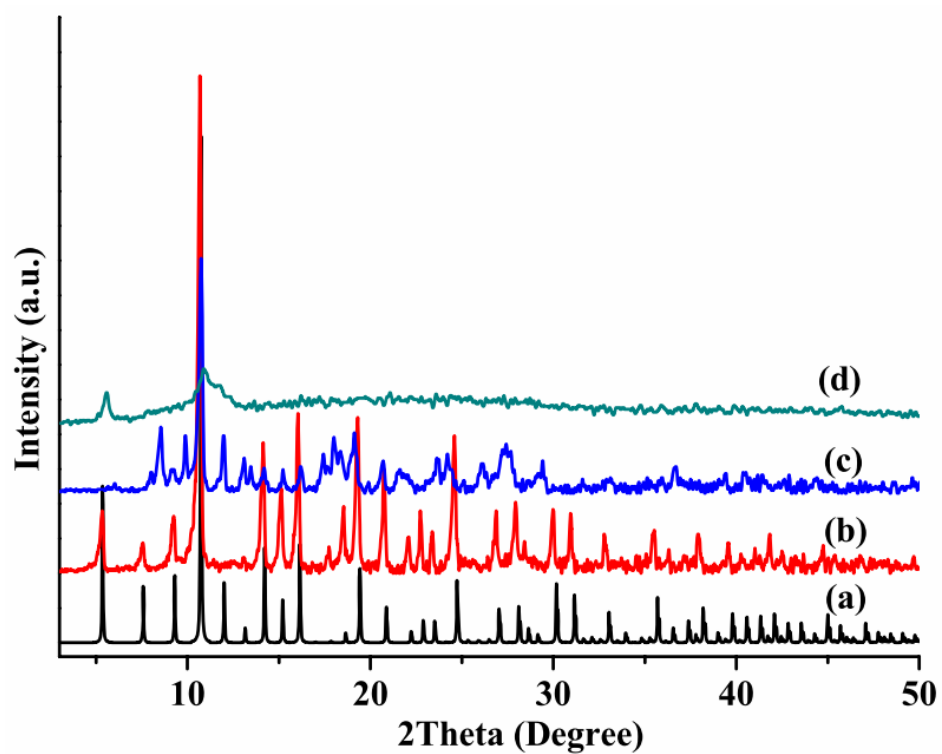

Figure S5. The Powder XRD pattern of **1**: (a) simulated; (b) experiment; (c) soaked in MeOH; (d) after activation.

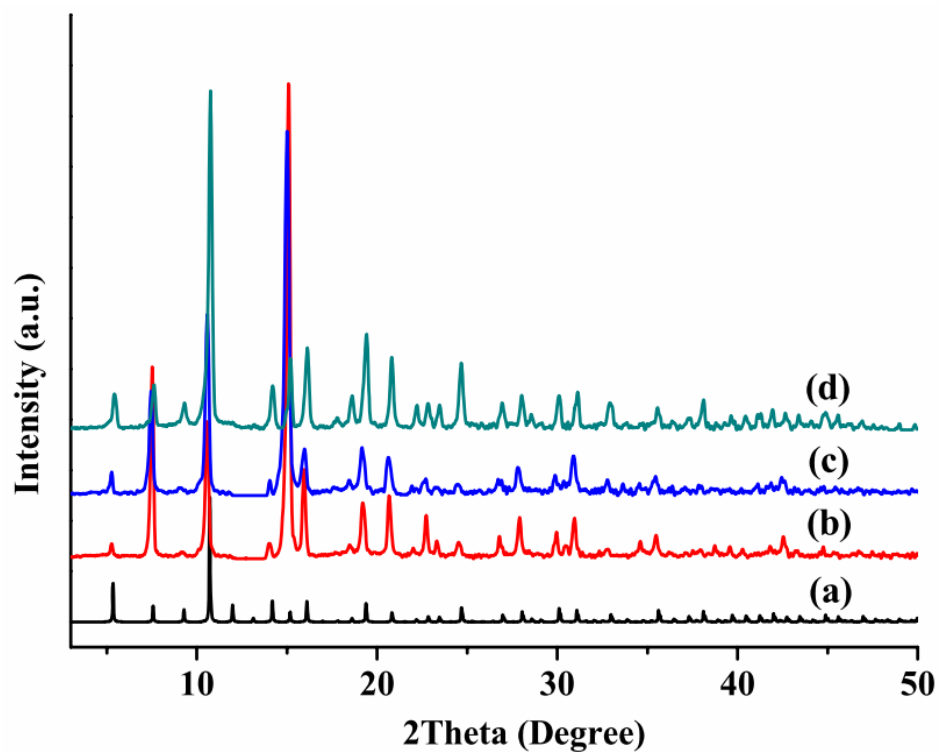

Figure S6. The Powder XRD pattern of **2**: (a) simulated; (b) experiment; (c) soaked in MeOH; (d) after adsorption.

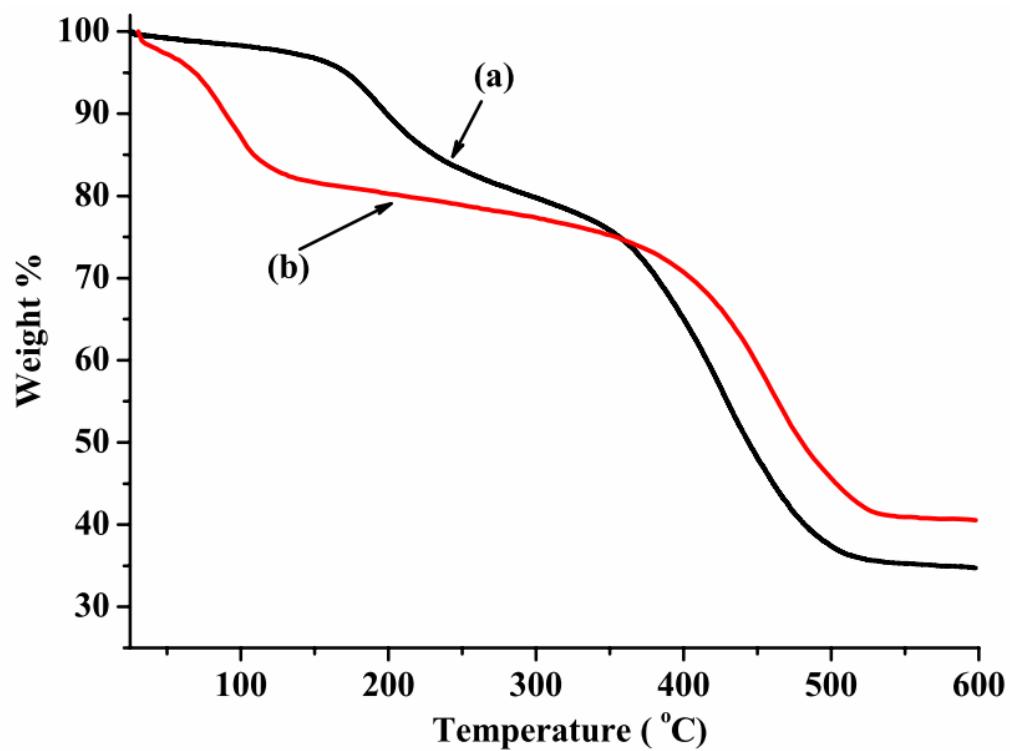

Figure S7. The TGA diagrams of **1** (a, black); The TGA diagrams of **1** soaked in MeOH (b, red).

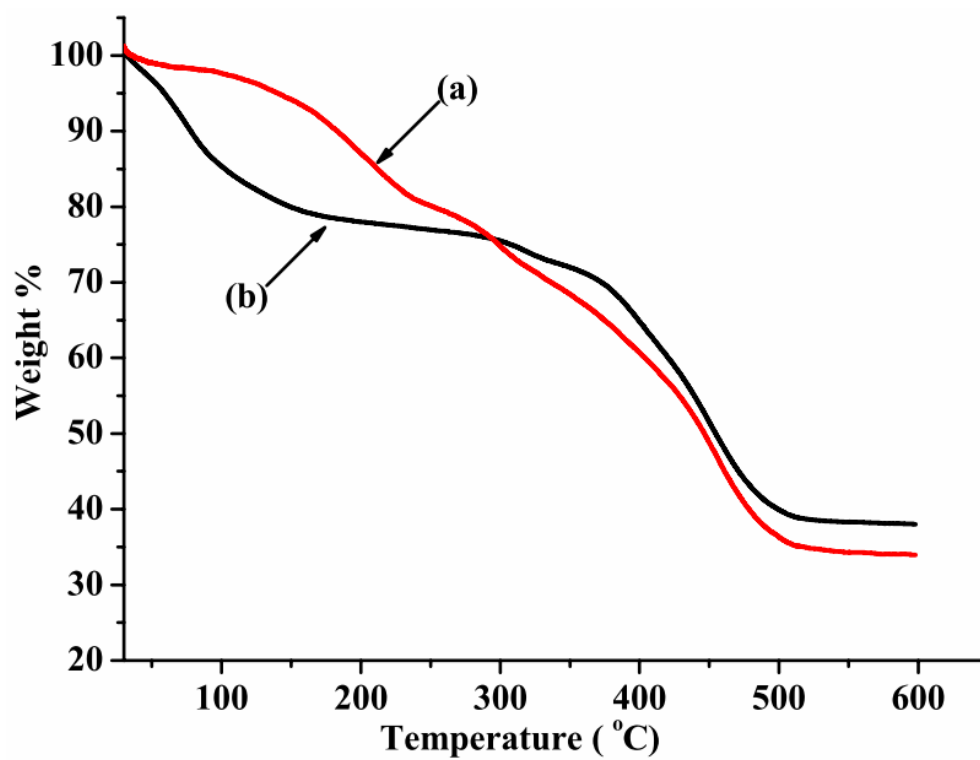

Figure S8. The TGA diagrams of **2** (a, red); The TGA diagrams of **2** soaked in MeOH (b, black).

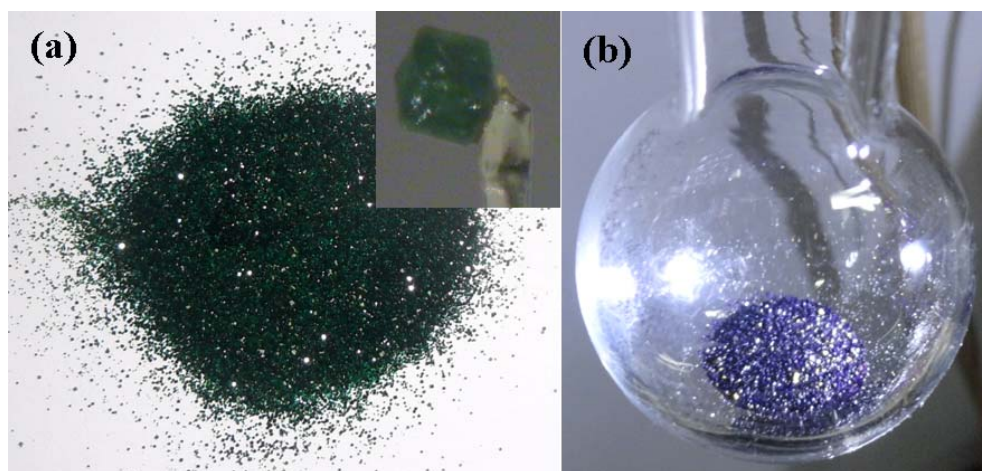

Figure S9. The photographs of **2** (a); after degassing (b).

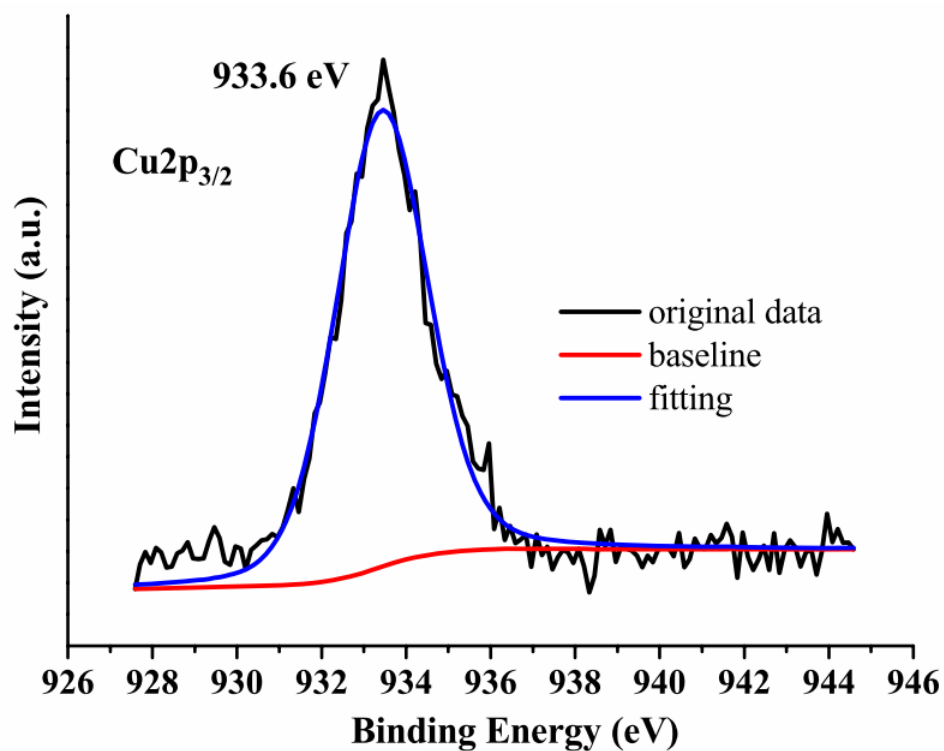

Figure S10. Cu<sub>2</sub>p<sub>3/2</sub> XPS spectra of **2**.

Figure S10 shows the Cu<sub>2</sub>p<sub>3/2</sub> XPS spectra of **2** with the main component peak at 933.6 eV, which should be attributed to Cu<sup>2+</sup> ions.

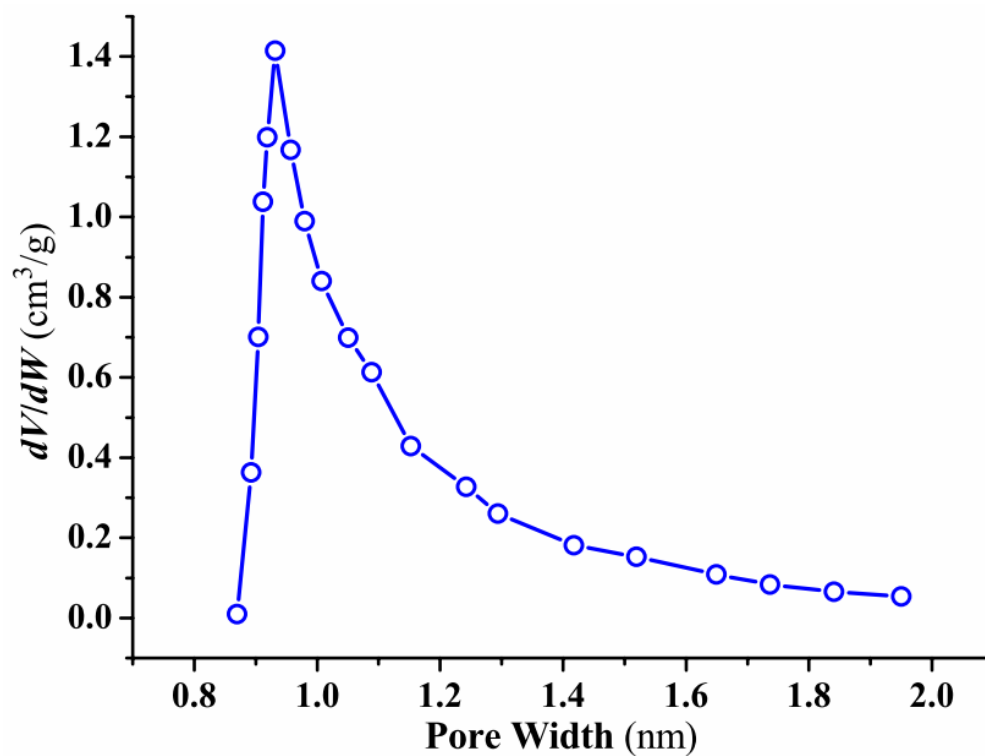

Figure S11. Pore size distribution based on Horvath-Kawazoe (H-K) model.

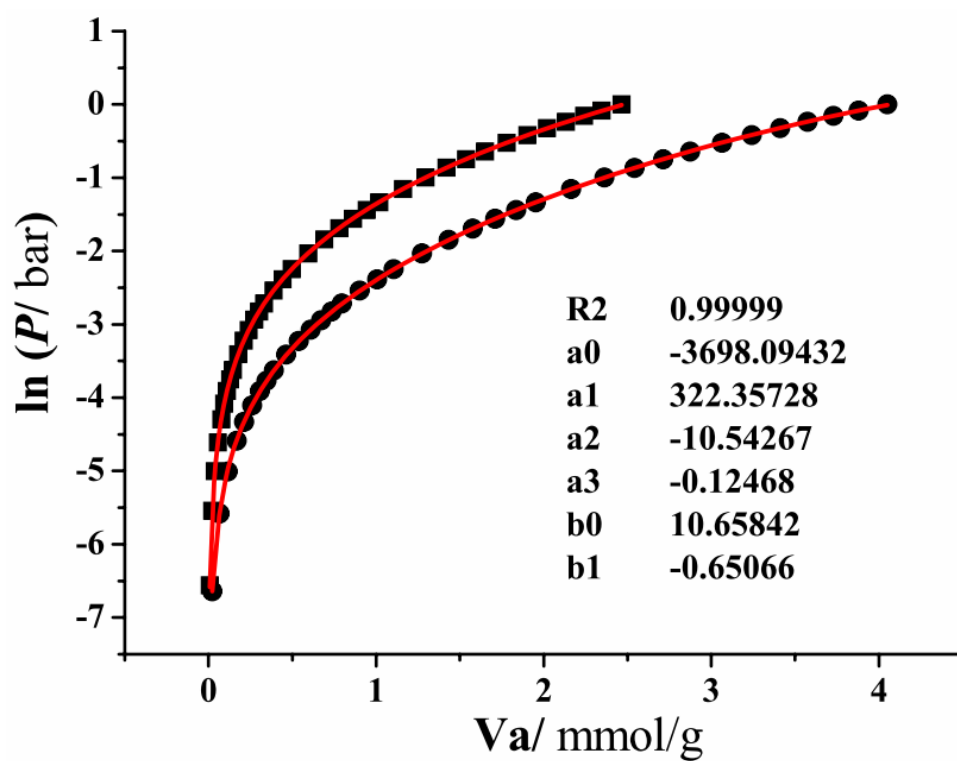

Figure S12. CO<sub>2</sub> adsorption isotherms for **2** fitting by virial method.

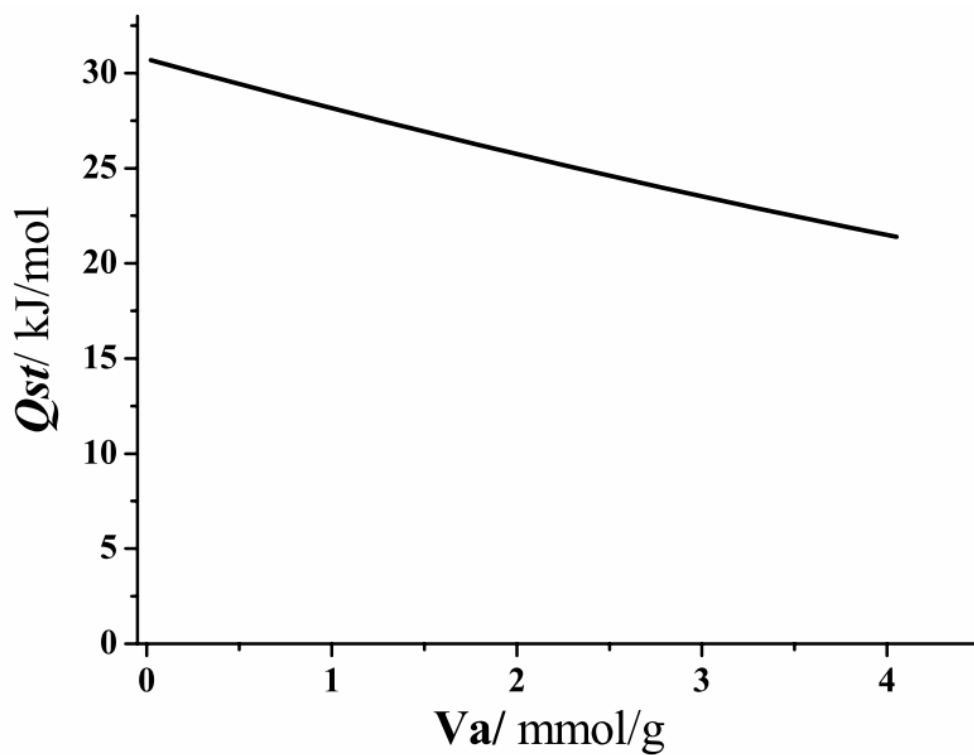

Figure S13. The isosteric heat of CO<sub>2</sub> adsorption for **2** estimated by the virial equation.



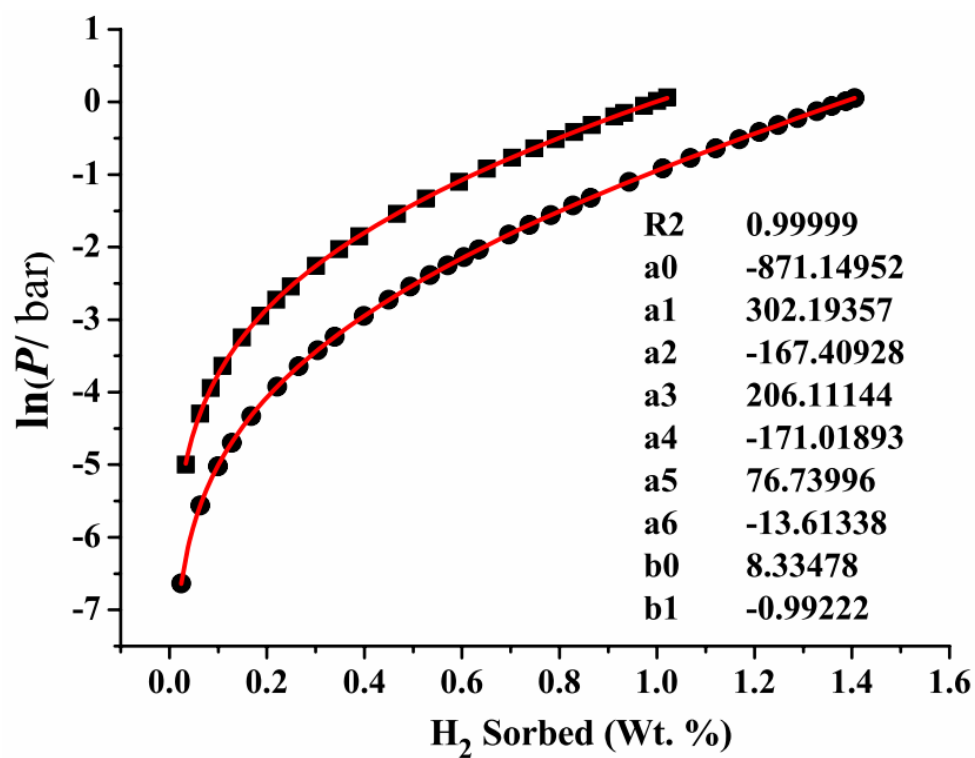

Figure S14.  $\text{H}_2$  adsorption isotherms for **2** fitting by virial method.

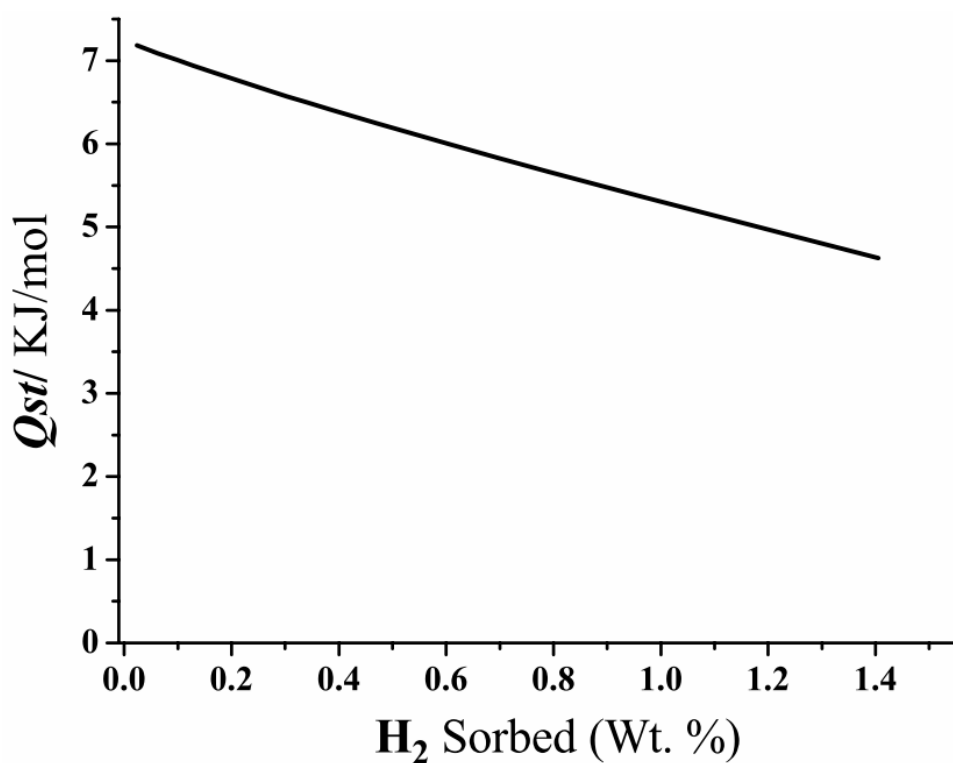

Figure S15. The isosteric heat of  $\text{H}_2$  adsorption for **2** estimated by the virial equation.

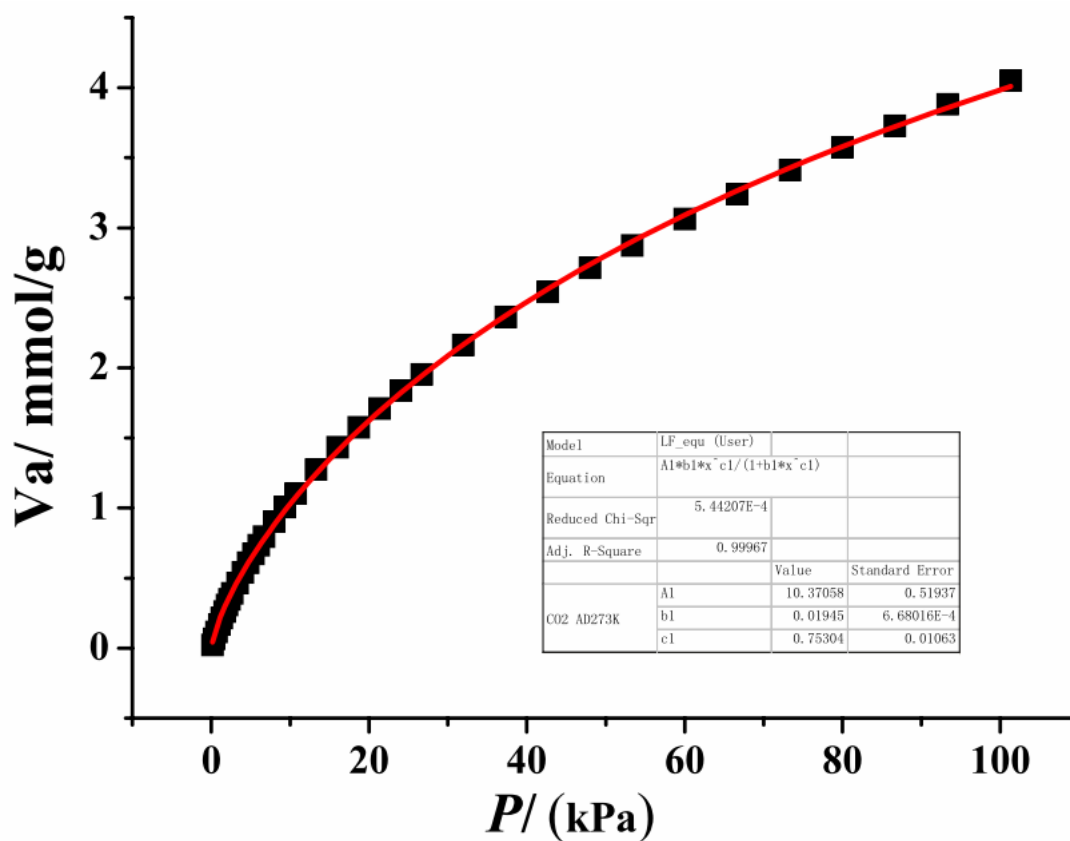

Figure S16. CO<sub>2</sub> isotherm (black squares) and Langmuir-Freundlich fit (red line) for **2** at 273K.

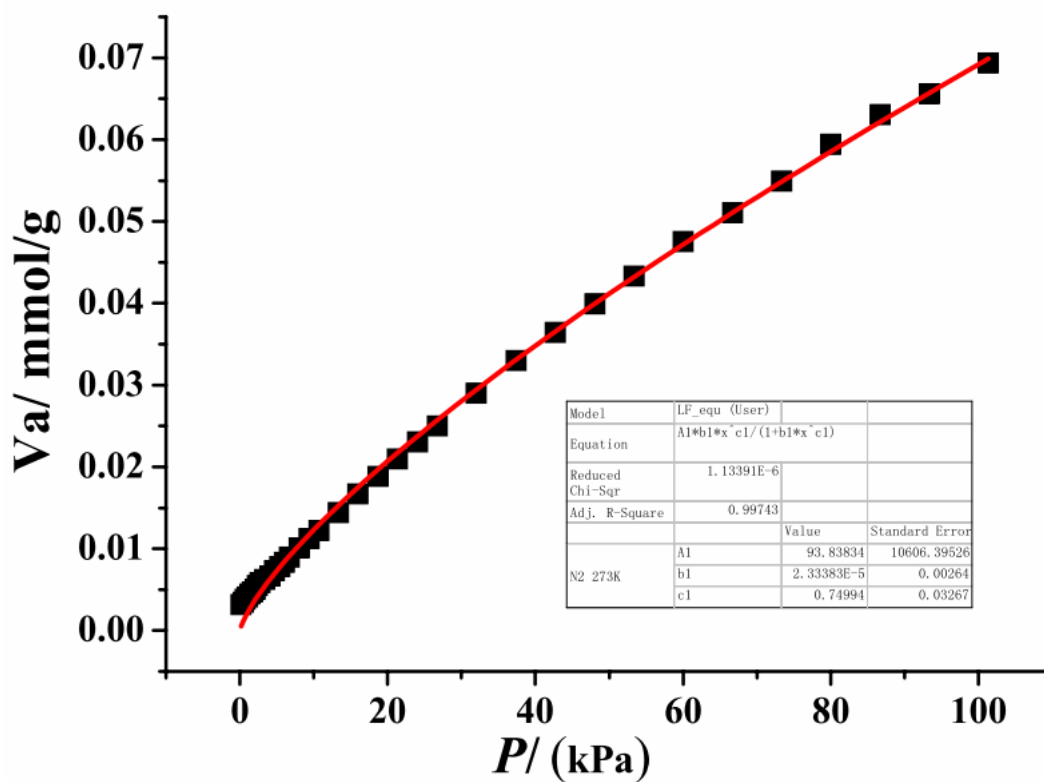

Figure S17. N<sub>2</sub> isotherm (black squares) and Langmuir-Freundlich fit (red line) for **2** at 273K.

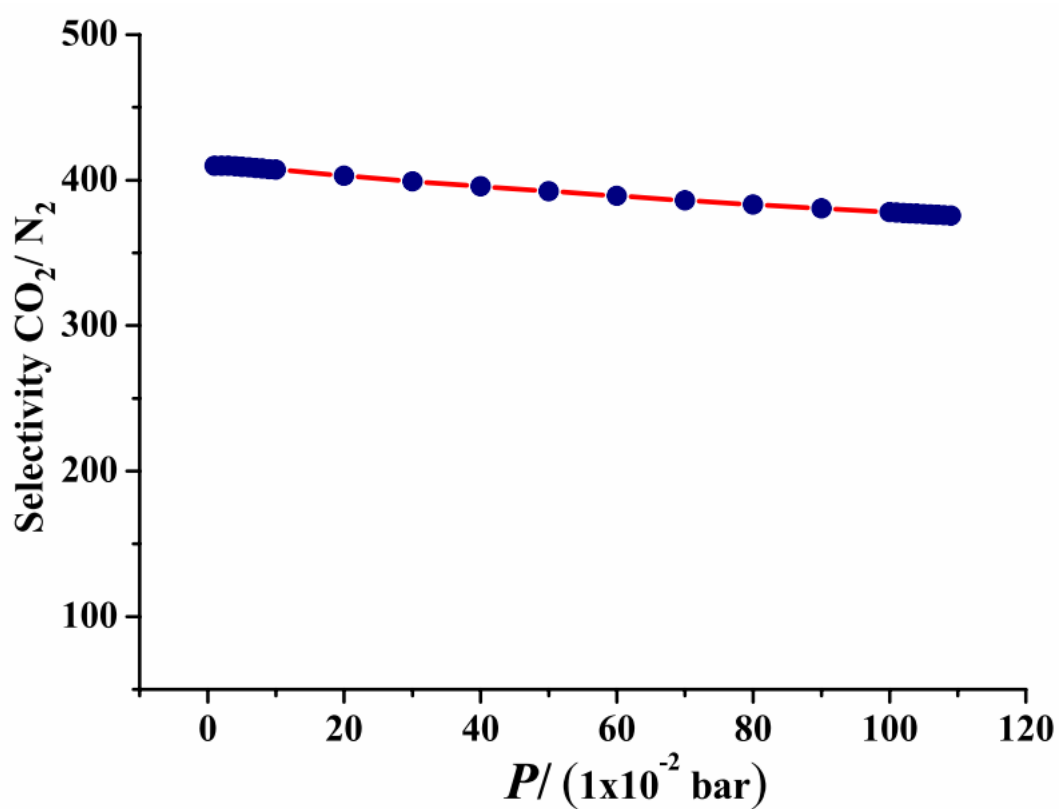

Figure S18. IAST-predicted adsorption selectivity of the mixture of  $\text{CO}_2$  and  $\text{N}_2$  for **2** at 273K.

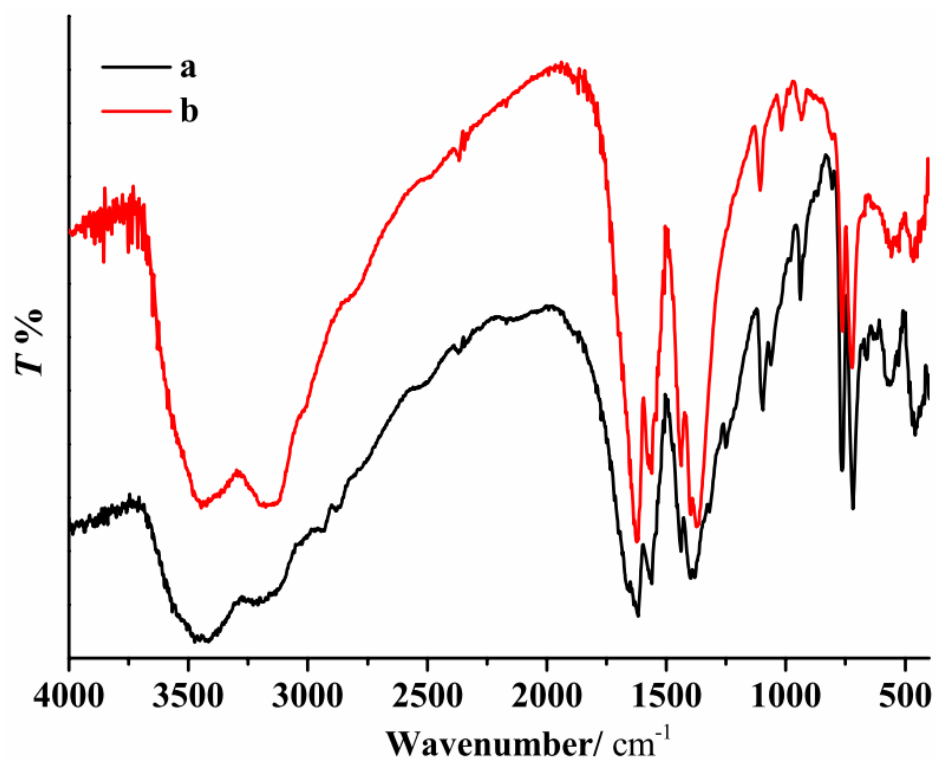

Figure S19. The IR spectras of compounds **1(a)** and **2(b)**.

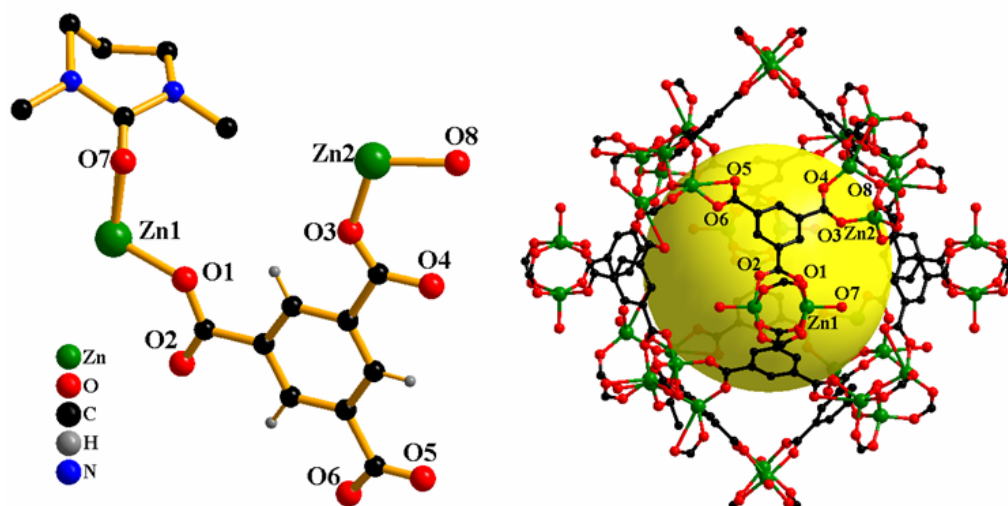

Figure S20. The asymmetric unit of **1** (a); cavity generate by symmetry operations (b).
